# Supplementary material for: Correction in Active Cases Data of COVID-19 for the US States by Analytical Study
Source: PubMed Central journal article supplement (PMC8267334; doi:10.1017/dmp.2021.130), 2021-04-30
Supplement: S1935789321001300sup001.pdf [file S1935789321001300sup001.pdf]

SUPPLEMENTARY MATERIAL

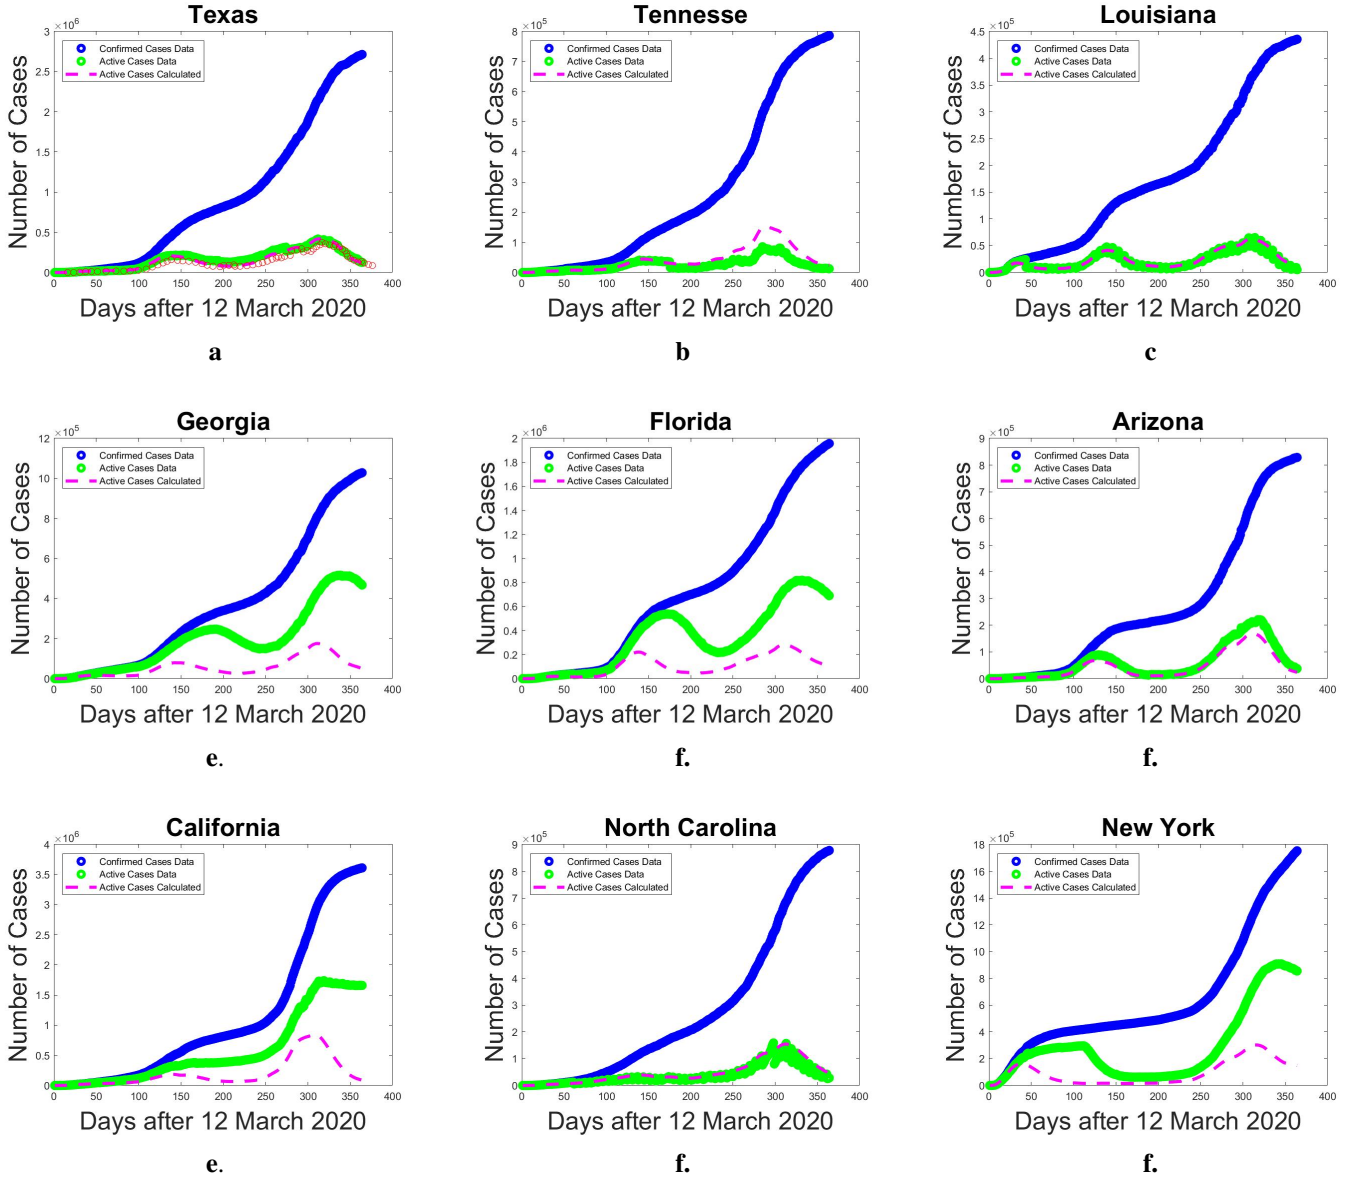

Fig. S1: Reported total cases, active Cases data and analytically estimated active cases for various US states

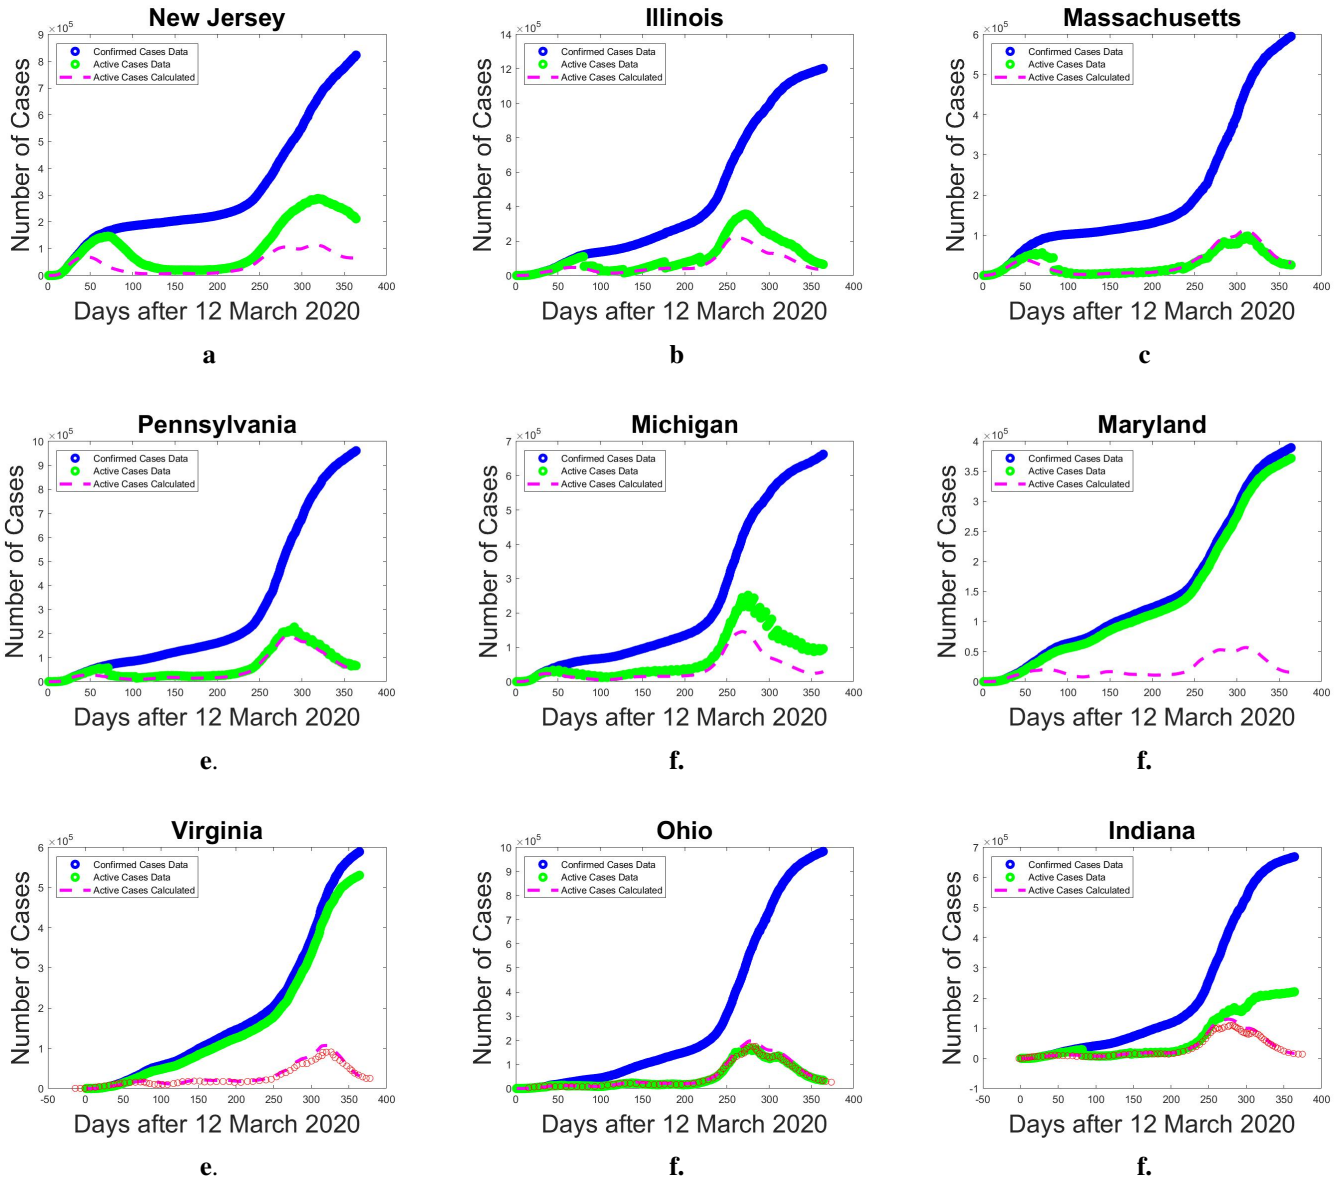

Fig. S2: Reported total cases, active Cases data and analytically estimated active cases for various US states

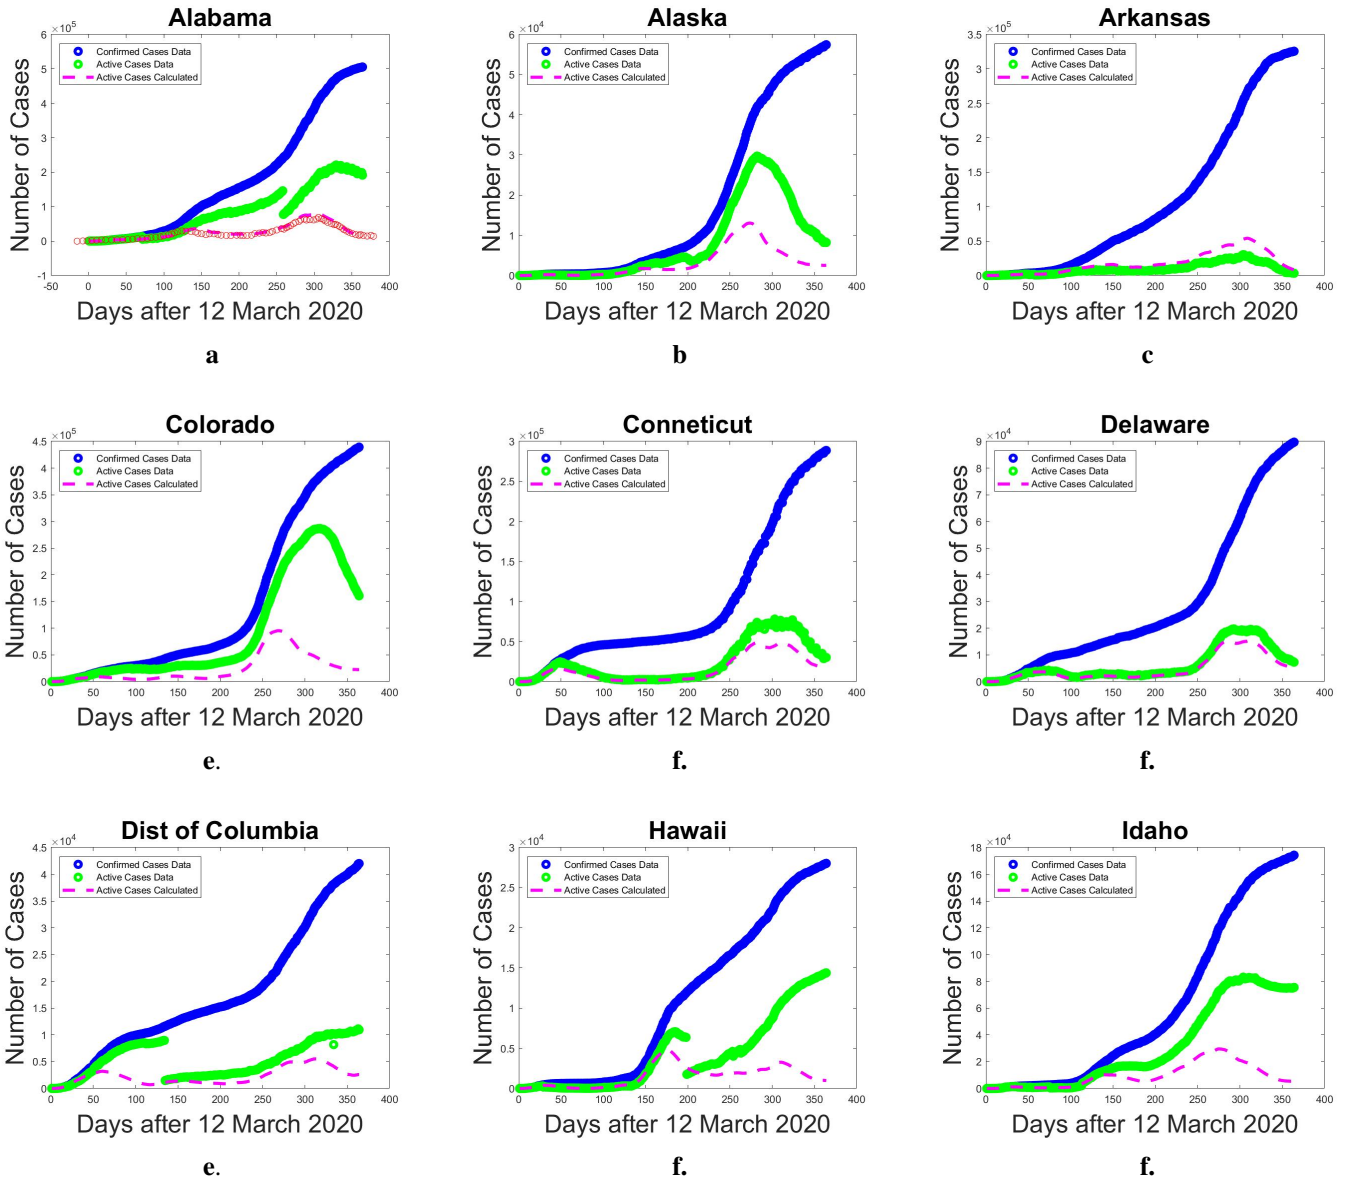

Fig. S3: Reported total cases, active Cases data and analytically estimated active cases for various US states

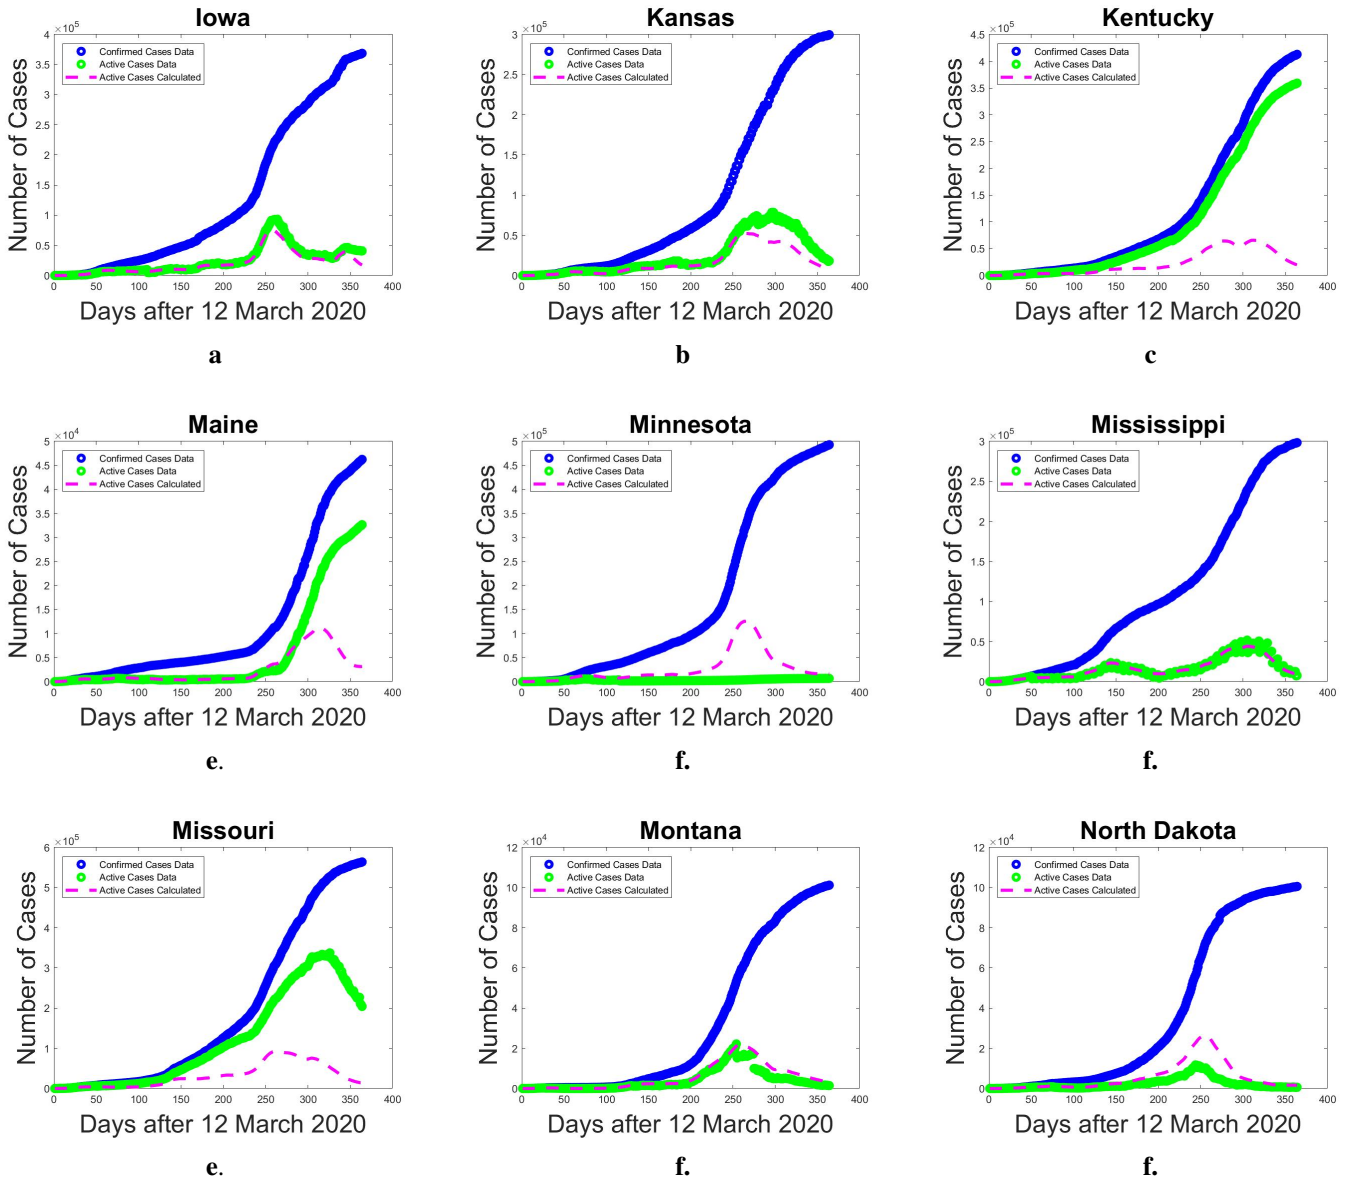

Fig. S4: Reported total cases, active Cases data and analytically estimated active cases for various US states

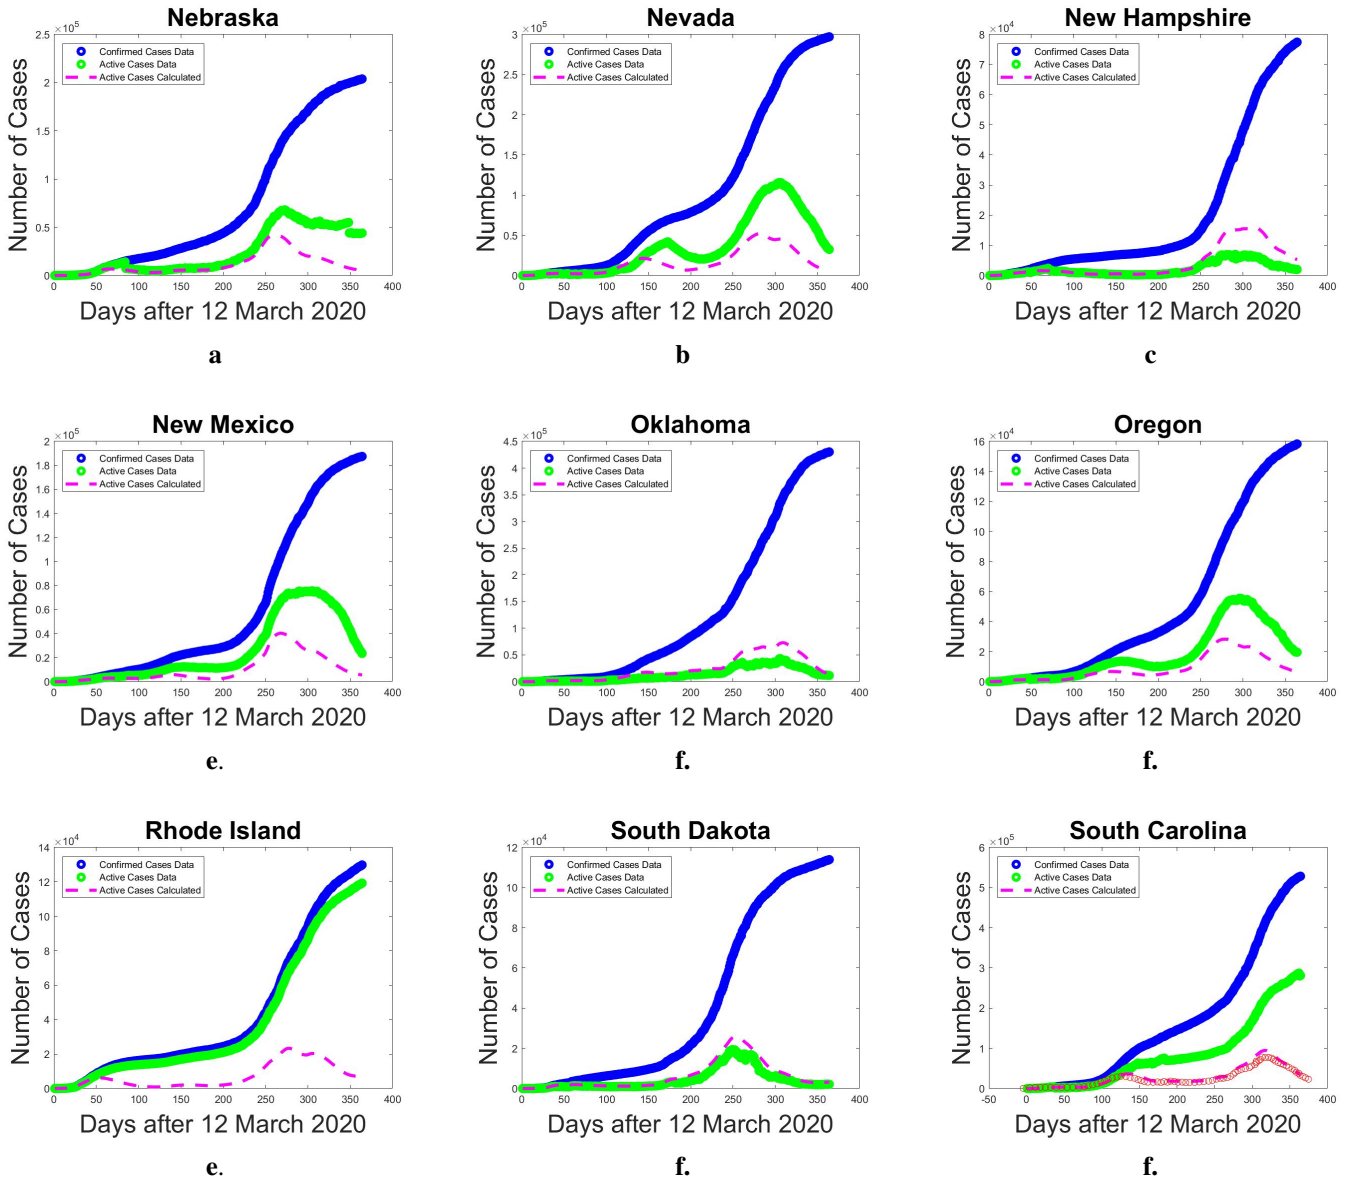

Fig. S5: Reported total cases, active Cases data and analytically estimated active cases for various US states

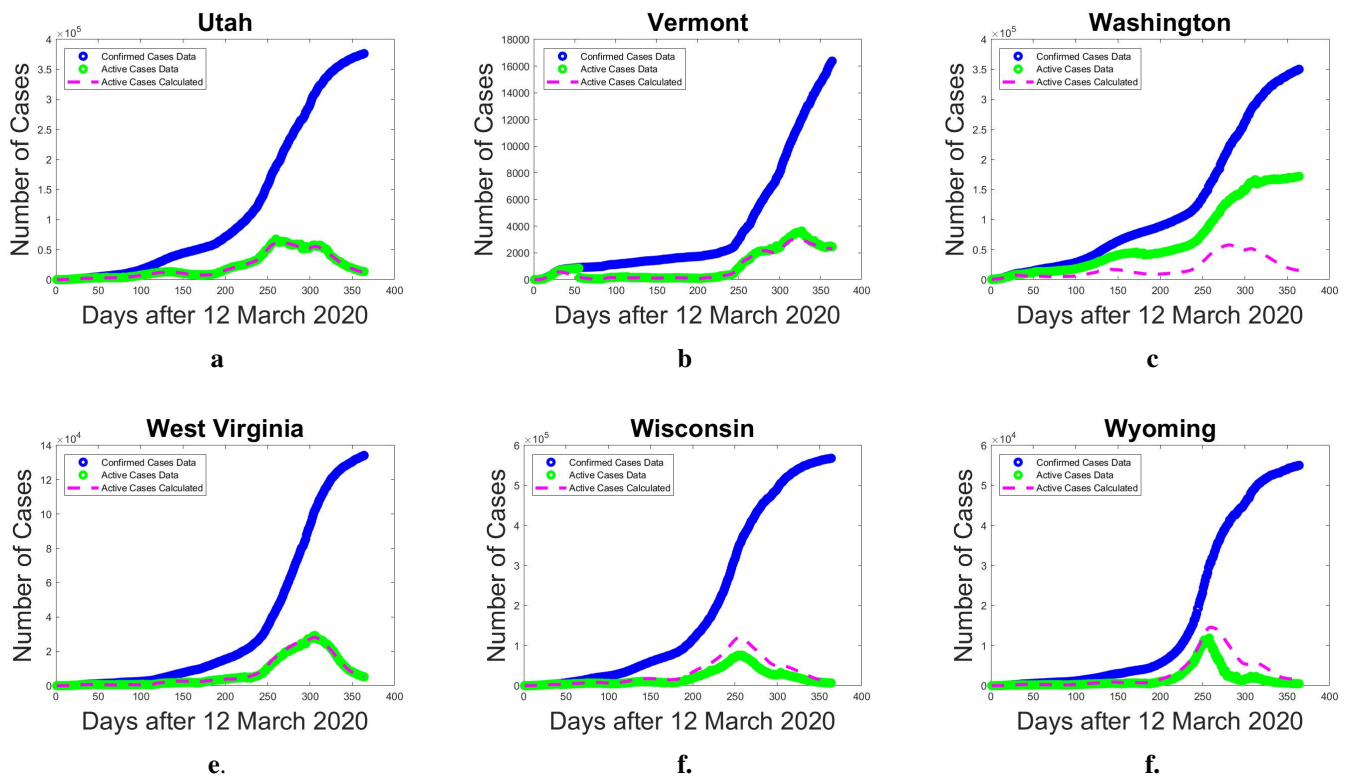

Fig. S6: Reported total cases, active Cases data and analytically estimated active cases for various US states
